# Supplementary material for: Flourishing despite Chronic Obstructive Pulmonary Disease (COPD): Findings from a Nationally Representative Survey of Canadians Aged 50 and Older
Source: MDPI journal article supplement (doi:10.3390/ijerph192316337), 2022-12-06
Supplement: s1 [file s1]

# Supplementary Materials

**Table S1.** Odds ratio, 95% Confidence Intervals, unstandardized coefficient (B), Standard Error of the Mean (S.E.), Wald, and Degrees of Freedom (df) of Absence of Psychiatric Disorders (APD) in Past Year for Those with a History of COPD in a Population-based Sample of Canadians aged 50 and Older (n = 703).

|                                                                   | Odds Ratio for (APD) “No<br>Past-Year Mental Illness,<br>Substance Dependence or<br>Suicidality” | 95% CI        | B     | S.E. | Wald  | df   |
|-------------------------------------------------------------------|--------------------------------------------------------------------------------------------------|---------------|-------|------|-------|------|
| <b>Demographics</b>                                               |                                                                                                  |               |       |      |       |      |
| Gender                                                            |                                                                                                  |               |       |      |       |      |
| Male (ref.)                                                       | 1                                                                                                | REF           |       |      |       |      |
| Female                                                            | 1.61                                                                                             | (0.71, 3.62)  | 0.47  | 0.41 | 1.31  | 1.00 |
| Ethnicity                                                         |                                                                                                  |               |       |      |       |      |
| Visible Minority (ref.)                                           | 1                                                                                                | REF           |       |      |       |      |
| White                                                             | 1.51                                                                                             | (0.45, 5.07)  | 0.41  | 0.62 | 0.45  | 1.00 |
| Age in Decades                                                    | 1.14                                                                                             | (0.80, 1.62)  | 0.13  | 0.18 | 0.52  | 1.00 |
| <b>Socioeconomic Status</b>                                       |                                                                                                  |               |       |      |       |      |
| Education                                                         |                                                                                                  |               |       |      |       |      |
| No post-secondary degree (ref.)                                   | 1                                                                                                | REF           |       |      |       |      |
| Has post-secondary degree                                         | 0.82                                                                                             | (0.44, 1.55)  | -0.20 | 0.32 | 0.37  | 1.00 |
| Household Income                                                  |                                                                                                  |               |       |      |       |      |
| Lowest 10% of household income (ref.)                             | 1                                                                                                | REF           |       |      |       |      |
| 11-50%                                                            | 1.15                                                                                             | (0.46, 2.86)  | 0.14  | 0.46 | 0.09  | 1.00 |
| Top 50% of household income                                       | 1.66                                                                                             | (0.64, 4.28)  | 0.51  | 0.48 | 1.10  | 1.00 |
| <b>Social Support</b>                                             |                                                                                                  |               |       |      |       |      |
| Marital Status                                                    |                                                                                                  |               |       |      |       |      |
| Single/Divorced/widowed (ref.)                                    | 1                                                                                                | REF           |       |      |       |      |
| Married/Common in Law                                             | 2.14 *                                                                                           | (1.11, 4.15)  | 0.76  | 0.34 | 5.12  | 1.00 |
| Presence of a Confidant                                           |                                                                                                  |               |       |      |       |      |
| Strongly Disagree/Disagree (ref.)                                 | 1                                                                                                | REF           |       |      |       |      |
| Strongly Agree/Agree                                              | 7.97 ***                                                                                         | (3.36, 18.93) | 2.08  | 0.44 | 22.15 | 1.00 |
| <b>Physical Health</b>                                            |                                                                                                  |               |       |      |       |      |
| Smoking                                                           |                                                                                                  |               |       |      |       |      |
| Ever Smoker (ref.)                                                | 1                                                                                                | REF           |       |      |       |      |
| Never                                                             | 0.59                                                                                             | (0.22, 1.59)  | -0.53 | 0.51 | 1.08  | 1.00 |
| BMI (self-reported)                                               |                                                                                                  |               |       |      |       |      |
| No (ref.)                                                         | 1                                                                                                | REF           |       |      |       |      |
| Yes (Obese)                                                       | 0.63                                                                                             | (0.31, 1.25)  | -0.47 | 0.35 | 1.77  | 1.00 |
| Sleep Problems                                                    |                                                                                                  |               |       |      |       |      |
| Most or all the time sleep problems (ref.)                        | 1                                                                                                | REF           |       |      |       |      |
| Never to some sleep problems                                      | 1.38                                                                                             | (0.70, 2.72)  | 0.32  | 0.34 | 0.89  | 1.00 |
| Pain preventing activities                                        |                                                                                                  |               |       |      |       |      |
| Pain prevents few/some/most activities (ref.)                     | 1                                                                                                | REF           |       |      |       |      |
| No pain or no activity prevented by pain                          | 1.18                                                                                             | (0.58, 2.41)  | 0.16  | 0.36 | 0.20  | 1.00 |
| <b>Coping Strategies</b>                                          |                                                                                                  |               |       |      |       |      |
| Spiritual Values                                                  |                                                                                                  |               |       |      |       |      |
| Not very/not at all important (ref.)                              | 1                                                                                                | REF           |       |      |       |      |
| Very/somewhat important                                           | 0.52+                                                                                            | (0.24, 1.12)  | -0.66 | 0.39 | 2.80  | 1.00 |
| Moderate or Vigorous Physical Activity                            |                                                                                                  |               |       |      |       |      |
| No (ref.)                                                         | 1.00                                                                                             | REF           |       |      |       |      |
| Yes                                                               | 3.95 ***                                                                                         | (1.94, 8.08)  | 1.37  | 0.36 | 14.22 | 1.00 |
| <b>Mental Health History/Adverse Childhood Experiences (ACEs)</b> |                                                                                                  |               |       |      |       |      |
|                                                                   | 0.69                                                                                             | (0.48,0.98)   |       |      |       |      |
|                                                                   |                                                                                                  |               | -0.38 | 0.18 | 4.25  | 1.00 |

|                                                                                                    |           |               |      |      |       |      |  |
|----------------------------------------------------------------------------------------------------|-----------|---------------|------|------|-------|------|--|
| Per each ACES                                                                                      |           |               |      |      |       |      |  |
| Major Depressive Disorder                                                                          |           |               |      |      |       |      |  |
| Yes - lifetime (ref.)                                                                              | 1         | REF           |      |      |       |      |  |
| Never in Life                                                                                      | 11.27 *** | (5.22, 24.34) | 2.42 | 0.39 | 37.98 | 1.00 |  |
| General Anxiety Disorder                                                                           |           |               |      |      |       |      |  |
| Yes – lifetime (ref.)                                                                              | 1         | REF           |      |      |       |      |  |
| Never in Life                                                                                      | 9.93 ***  | (5.02, 19.63) | 2.30 | 0.35 | 43.60 | 1.00 |  |
| Drugs and Alcohol Abuse                                                                            |           |               |      |      |       |      |  |
| Either/Both (ref.)                                                                                 | 1         | REF           |      |      |       |      |  |
| Neither                                                                                            | 4.36 ***  | (2.11, 9.05)  | 1.47 | 0.37 | 15.68 | 1.00 |  |
| *** $p < 0.001$ , ** $p < 0.01$ , * $p < 0.05$ , + $p < 0.10$ but $p \geq 0.05$ ; REF = Reference. |           |               |      |      |       |      |  |

**Table S2.** Odds ratio, 95% Confidence Intervals, Unstandardized Coefficient (B), Standard Error of the Mean (S.E.), Wald, and Degrees of Freedom (df) of Complete Mental Health (CMH) in Past Year for Those with a History of COPD in a Population-based Sample of Canadians aged 50 and Older (n = 703).

|                                               | Odds Ratio of<br>Complete Mental<br>Health | 95% CI        | B     | S.E. | Wald  | df   |  |
|-----------------------------------------------|--------------------------------------------|---------------|-------|------|-------|------|--|
| <b>Demographics</b>                           |                                            |               |       |      |       |      |  |
| Gender                                        |                                            |               |       |      |       |      |  |
| Male (ref.)                                   | 1                                          | REF           |       |      |       |      |  |
| Female                                        | 1.14                                       | (0.74, 1.76)  | 0.13  | 0.22 | 0.37  | 1.00 |  |
| Ethnicity                                     |                                            |               |       |      |       |      |  |
| Visible Minority (ref.)                       | 1                                          | REF           |       |      |       |      |  |
| White                                         | 2.76 **                                    | (1.44, 5.30)  | 1.02  | 0.33 | 9.36  | 1.00 |  |
| Age in Decades                                | 1.18                                       | (0.96, 1.44)  | 0.16  | 0.10 | 2.45  | 1.00 |  |
| <b>Socioeconomic Status</b>                   |                                            |               |       |      |       |      |  |
| Education                                     |                                            |               |       |      |       |      |  |
| No post-secondary degree (ref.)               | 1                                          | REF           |       |      |       |      |  |
| Has post-secondary degree                     | 1.18                                       | (0.81, 1.71)  | 0.16  | 0.19 | 0.70  | 1.00 |  |
| Household Income                              |                                            |               |       |      |       |      |  |
| Lowest 10% of household income (ref.)         | 1                                          | REF           |       |      |       |      |  |
| 11-50%                                        | 0.9                                        | (0.51, 1.59)  | -0.10 | 0.29 | 0.12  | 1.00 |  |
| Top 50% of household income                   | 1.22                                       | (0.68, 2.17)  | 0.20  | 0.29 | 0.44  | 1.00 |  |
| <b>Social Support</b>                         |                                            |               |       |      |       |      |  |
| Marital Status                                |                                            |               |       |      |       |      |  |
| Single/Divorced/widowed (ref.)                | 1                                          | REF           |       |      |       |      |  |
| Married/Common in Law                         | 1.64 *                                     | (1.11, 2.42)  | 0.49  | 0.20 | 6.13  | 1.00 |  |
| Presence of a Confidant                       |                                            |               |       |      |       |      |  |
| Strongly Disagree/Disagree (ref.)             | 1                                          | REF           |       |      |       |      |  |
| Strongly Agree/Agree                          | 6.93 ***                                   | (3.32, 14.47) | 1.94  | 0.38 | 26.53 | 1.00 |  |
| <b>Physical Health</b>                        |                                            |               |       |      |       |      |  |
| Smoking                                       |                                            |               |       |      |       |      |  |
| Ever Smoker (ref.)                            | 1                                          | REF           |       |      |       |      |  |
| Never                                         | 1.21                                       | (0.68, 2.15)  | 0.19  | 0.29 | 0.41  | 1.00 |  |
| BMI (self-reported)                           |                                            |               |       |      |       |      |  |
| No (ref.)                                     | 1                                          | REF           |       |      |       |      |  |
| Yes (Obese)                                   | 1.24                                       | (0.81, 1.88)  | 0.21  | 0.21 | 0.99  | 1.00 |  |
| Sleep Problems                                |                                            |               |       |      |       |      |  |
| Most or all the time sleep problems (ref.)    | 1                                          | REF           |       |      |       |      |  |
| Never to some sleep problems                  | 1.23                                       | (0.81, 1.87)  | 0.21  | 0.21 | 0.94  | 1.00 |  |
| Pain preventing activities                    |                                            |               |       |      |       |      |  |
| Pain prevents few/some/most activities (ref.) | 1                                          | REF           |       |      |       |      |  |
| No pain or no activity prevented by pain      | 1.44+                                      | (0.97, 2.12)  | 0.36  | 0.20 | 3.31  | 1.00 |  |
| <b>Coping Strategies</b>                      |                                            |               |       |      |       |      |  |
| Spiritual Values                              |                                            |               |       |      |       |      |  |
| Not very/not at all important (ref.)          | 1                                          | REF           |       |      |       |      |  |

|                                                                   |          |              |       |      |       |      |
|-------------------------------------------------------------------|----------|--------------|-------|------|-------|------|
| Very/somewhat important                                           | 1.50+    | (0.98, 2.29) | 0.40  | 0.22 | 3.45  | 1.00 |
| Moderate or Vigorous Physical Activity                            |          |              |       |      |       |      |
| No (ref.)                                                         | 1        | REF          |       |      |       |      |
| Yes                                                               | 2.16 *** | (1.47, 3.17) | 0.77  | 0.20 | 15.26 | 1.00 |
| <b>Mental Health History/Adverse Childhood Experiences (ACEs)</b> |          |              |       |      |       |      |
|                                                                   |          | (0.63, 1.01) | -0.23 | 0.12 | 3.59  | 1.00 |
| Per each ACES                                                     |          |              |       |      |       |      |
| Major Depressive Disorder                                         | 0.79     |              |       |      |       |      |
| Yes - lifetime (ref.)                                             | 1        | REF          |       |      |       |      |
| Never in Life                                                     | 1.87 *   | (1.07, 3.26) | 0.63  | 0.28 | 4.89  | 1.00 |
| General Anxiety Disorder                                          |          |              |       |      |       |      |
| Yes – lifetime (ref.)                                             | 1        | REF          |       |      |       |      |
| Never in Life                                                     | 3.16 *** | (1.92, 5.20) | 1.15  | 0.26 | 20.31 | 1.00 |
| Drugs and Alcohol Abuse                                           |          |              |       |      |       |      |
| Either/Both (ref.)                                                | 1        | REF          |       |      |       |      |
| Neither                                                           | 1.27     | (0.82, 1.97) | 0.24  | 0.22 | 1.14  | 1.00 |

\*\*\*  $p < 0.001$ , \*\*  $p < 0.01$ , \*  $p < 0.05$ , +  $p < 0.10$  but  $p \geq 0.05$ ; REF = Reference.
